# Supplementary material for: Heatstroke predictions by machine learning, weather information, and an all-population registry for 12-hour heatstroke alerts
Source: PubMed Central journal article supplement (PMC8319225; doi:10.1038/s41467-021-24823-0), 2021-07-28
Supplement: 41467_2021_24823_MOESM1_ESM.pdf [file 41467_2021_24823_MOESM1_ESM.pdf]

**Supplementary information for “Heatstroke predictions by machine learning, weather information, and an all-population registry for 12-hour heatstroke alerts”**

**Contents**

Supplementary Figure 1 to 7

Supplementary Table 1 to 3

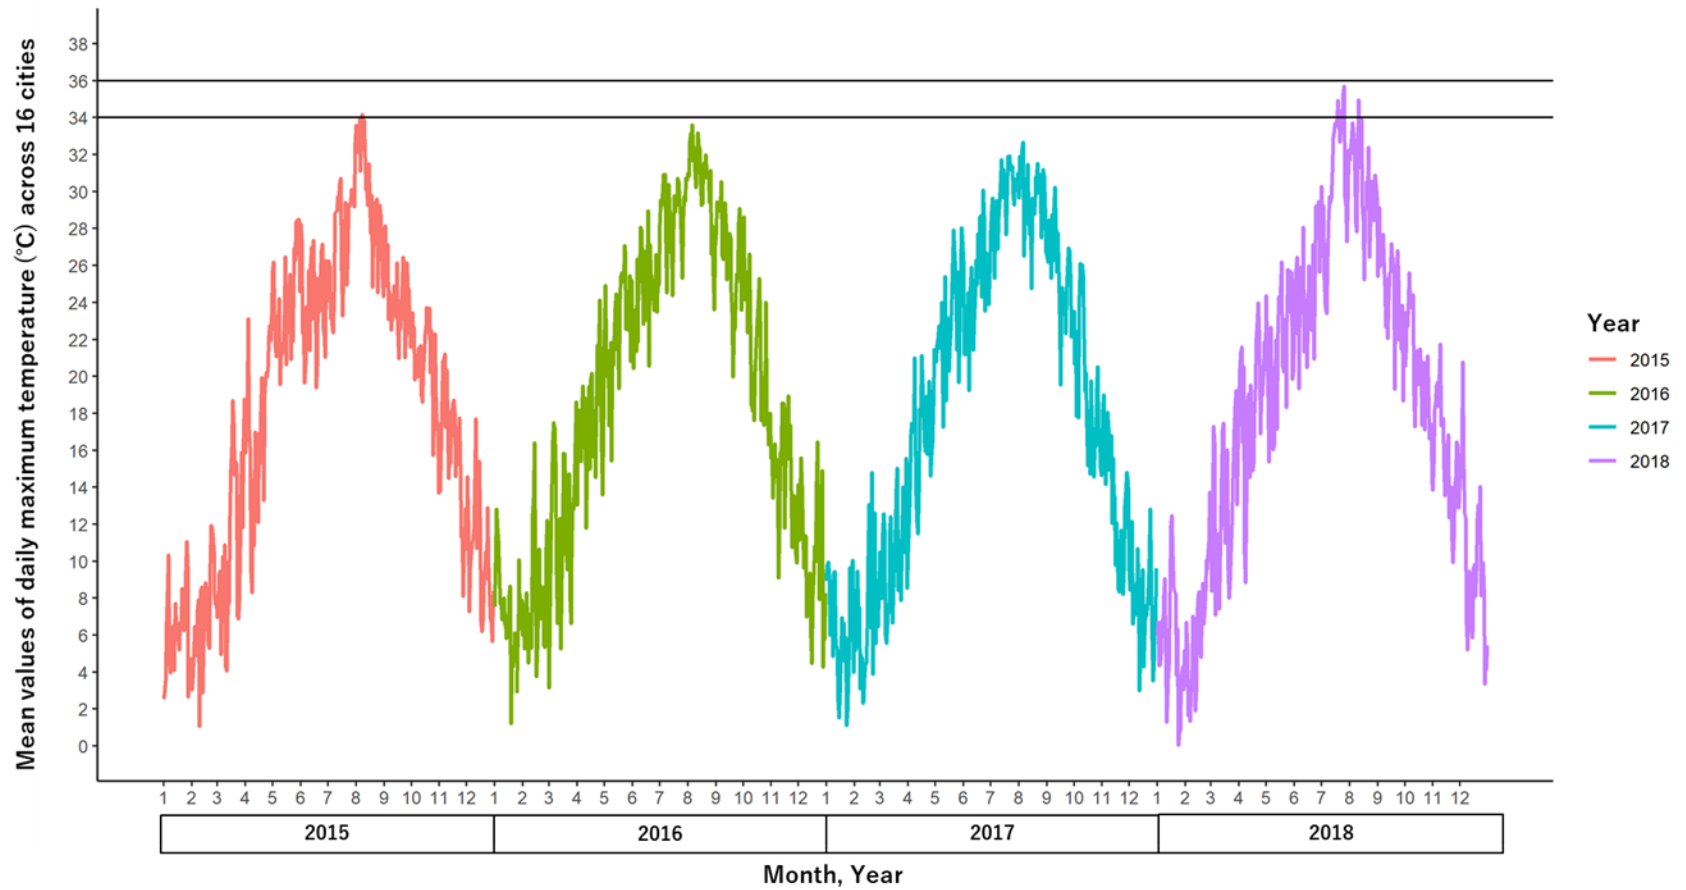

**Supplementary Figure 1. Mean values of daily maximum temperature across 16 participating cities between 2015 and 2018**

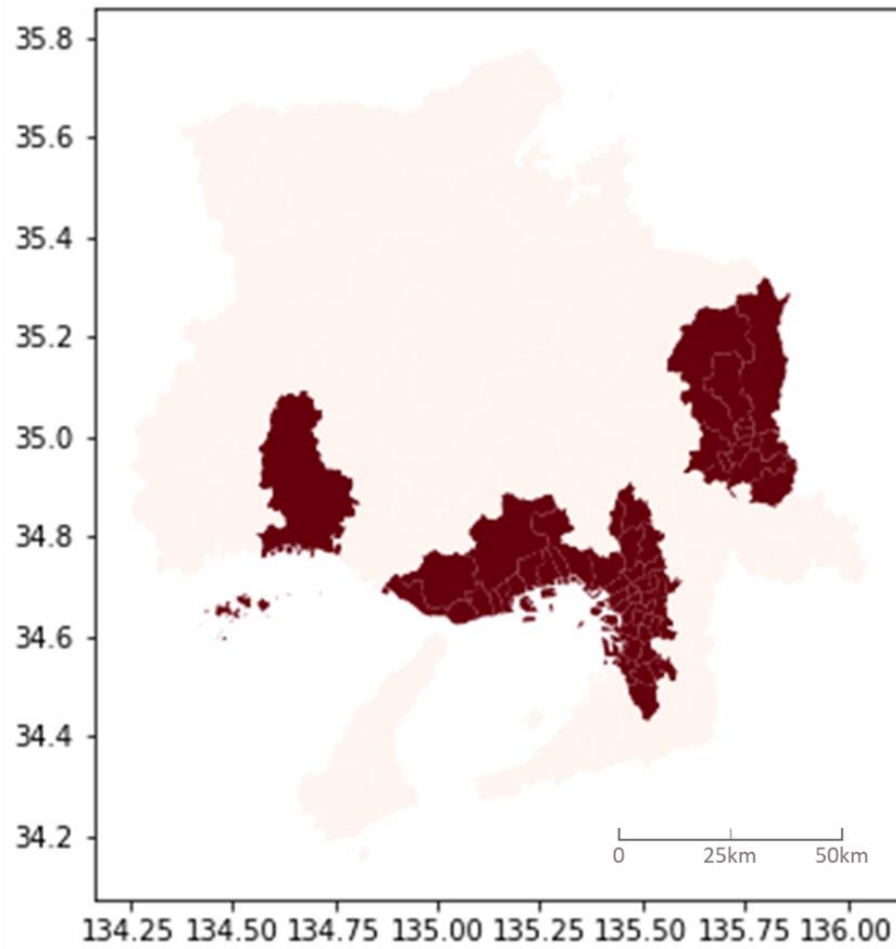

**Supplementary Figure 2. Location of the participating 16 cities in Japan**

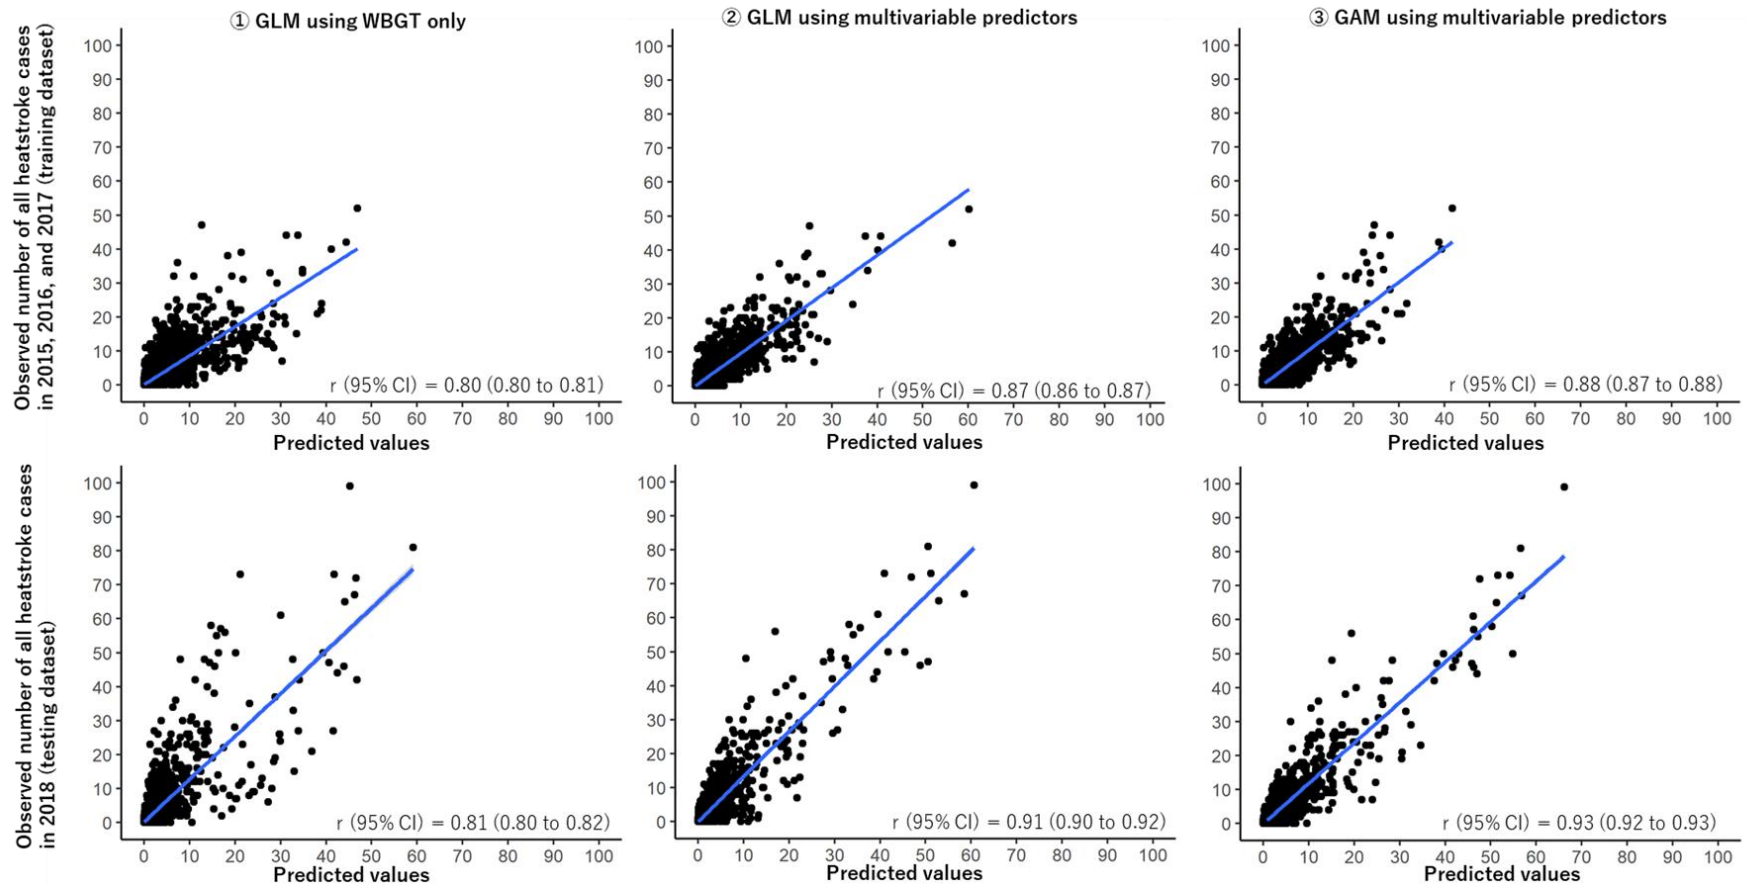

**Supplementary Figure 3. Plots between observed and predicted numbers of all heatstroke cases in 2015, 2016, and 2017 (i.e., training dataset, upper row), and 2018 (i.e., testing dataset, lower row) by GLMs and GAM**

Blue lines indicate regression lines between the observed and predicted values. Abbreviations: GLM, generalized linear model; WBGT, wet bulb globe temperature; GAM, generalized additive model;  $r$ , correlation coefficient; CI, confidence interval.

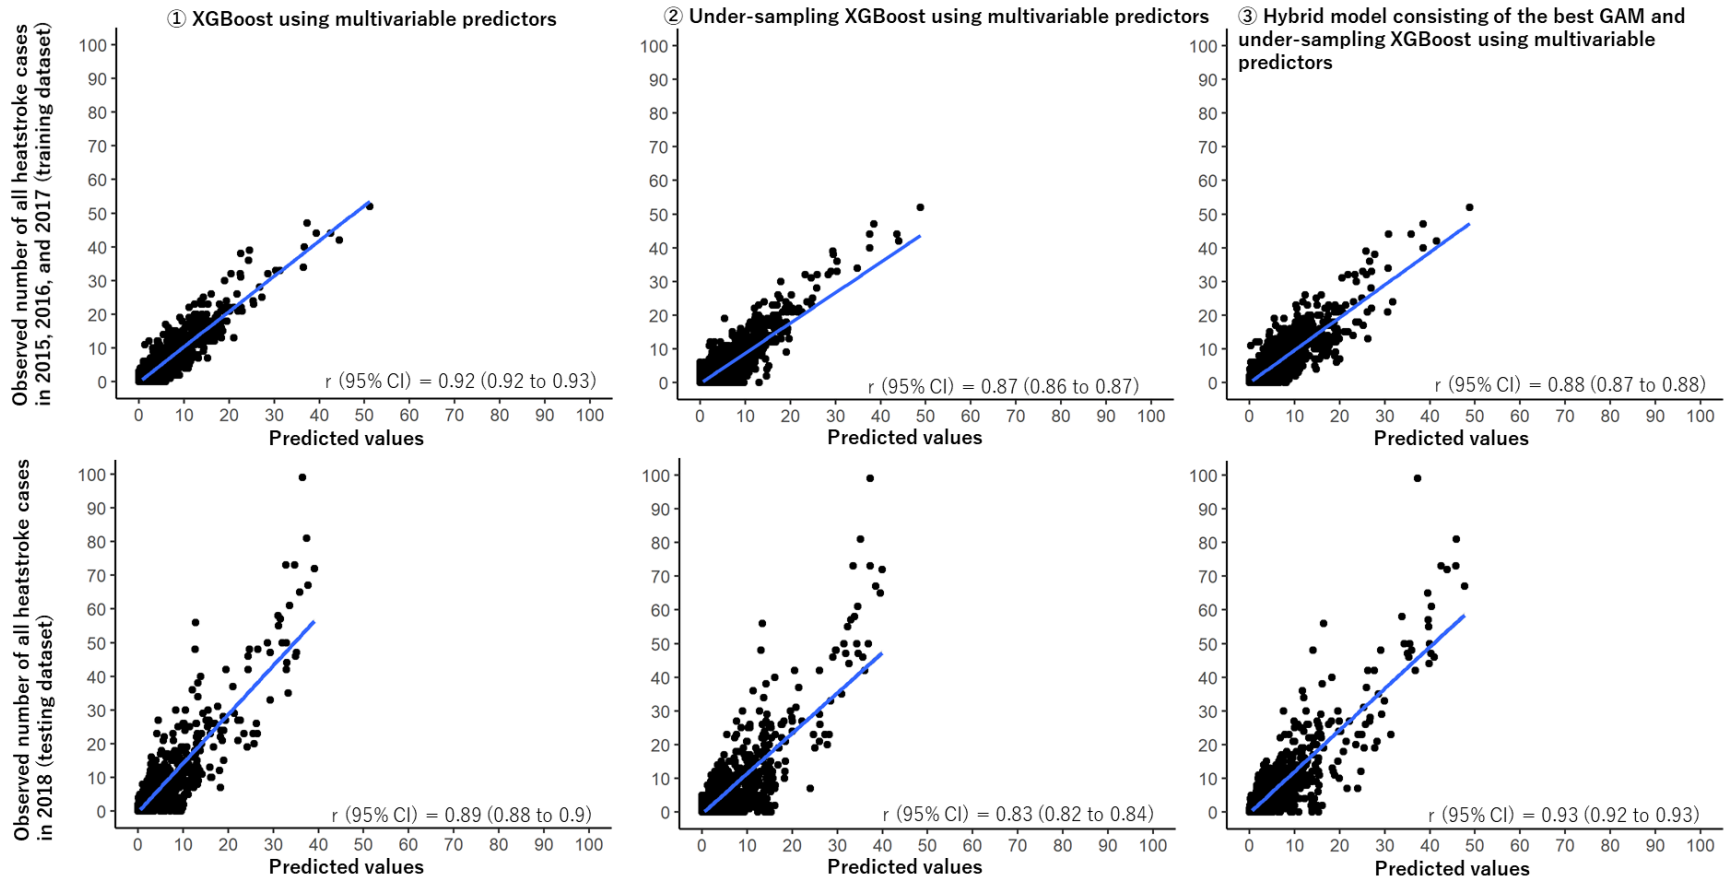

**Supplementary Figure 4. Plots between observed and predicted numbers of all heatstroke cases in 2015, 2016, and 2017 (i.e., training dataset, upper row), and 2018 (i.e., testing dataset, lower row) by XGBoost models and hybrid model**

Blue lines indicate regression lines between the observed and predicted values. Abbreviations: GAM, generalized additive model;

XGBoost, extreme gradient boosting decision tree;  $r$ , correlation coefficient; CI, confidence interval.

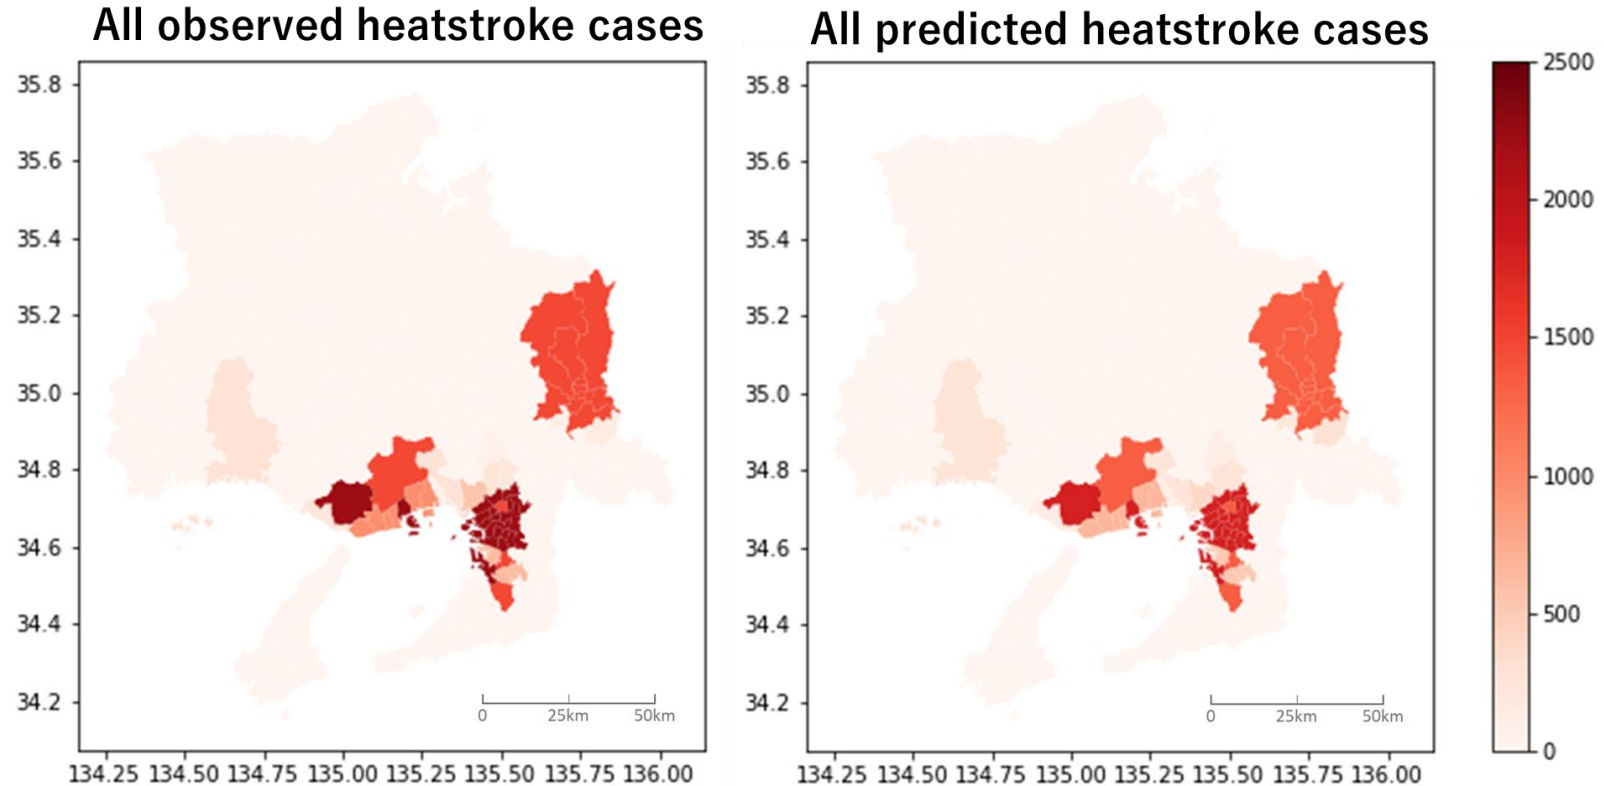

**Supplementary Figure 5. Heat map for observed and predicted (by the best model) numbers of all heatstroke cases summed up across the entire period in 2018 (i.e., the testing dataset)**

The low to high intensity of red color show low to high values of the number of heatstroke in the best prediction models (i.e., the hybrid model consisting of the GAM and the under-sampling XGBoost model) in a map for the 16 participating cities. The x and y-axis show latitude and longitude, respectively. Abbreviations: GAM, generalized additive model; XGBoost, extreme gradient boosting decision tree.

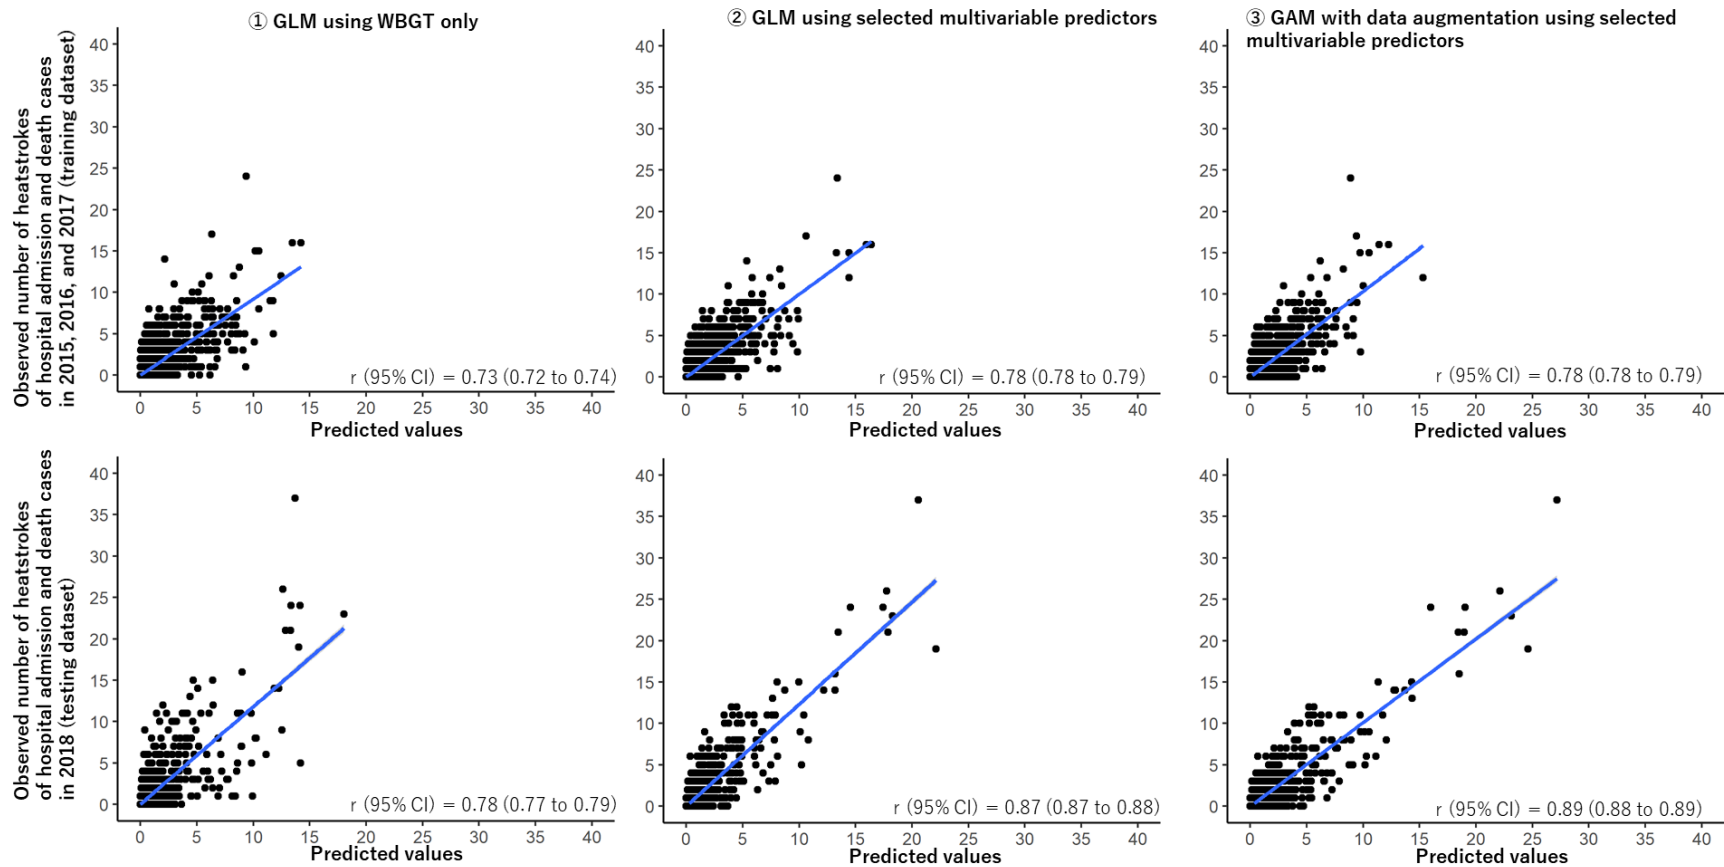

**Supplementary Figure 6. Plots between observed and predicted numbers of heatstrokes of hospital admission and death cases in 2015, 2016, and 2017 (i.e., training dataset, upper row), and 2018 (i.e., testing dataset, lower row) by GLMs and GAM**

Blue lines indicate regression lines between the observed and predicted values. Abbreviations: GLM, generalized linear model; WBGT, wet bulb globe temperature; GAM, generalized additive model; r, correlation coefficient; CI, confidence interval.

**Observed heatstrokes of hospital admission and death cases**

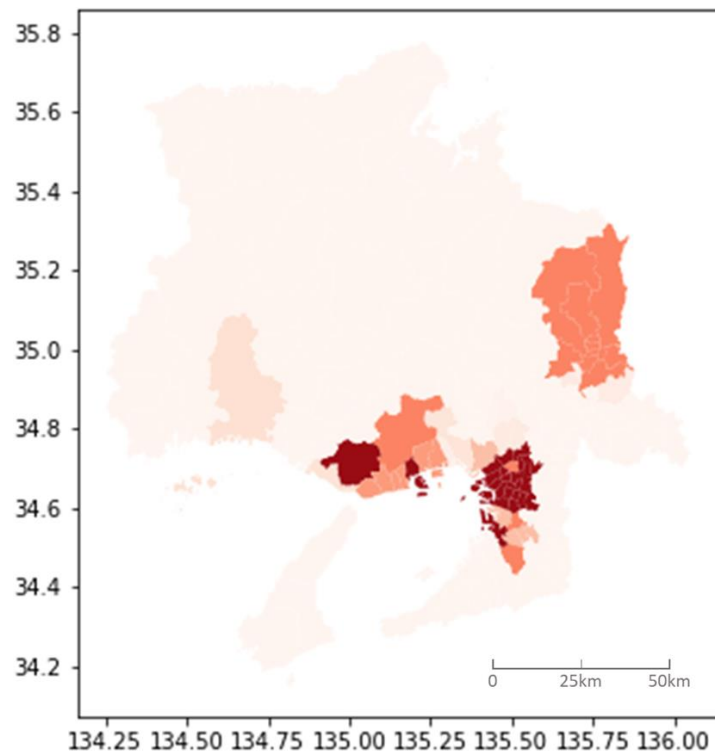

**Predicted heatstrokes of hospital admission and death cases**

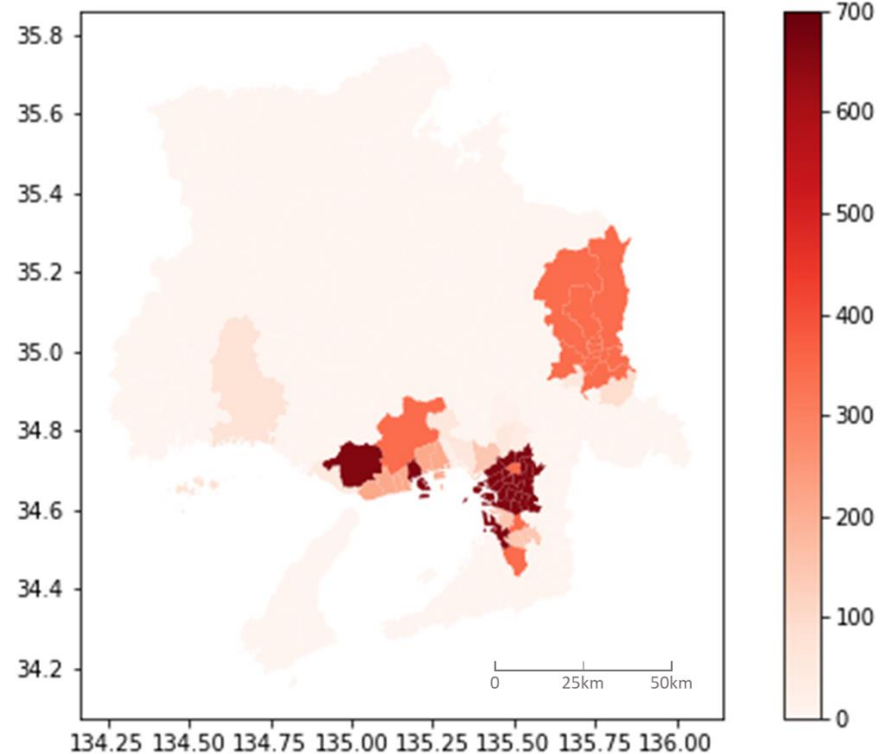

**Supplementary Figure 7. Heat map for observed and predicted (by the best model) numbers of heatstrokes of hospital admission and death cases summed up across the entire period in 2018 (i.e., testing dataset)**

The low to high intensity of red color show low to high values of the number of heatstrokes in the best prediction models (i.e., the GAM using multivariable predictors) in a map for the 16 participating cities. The x and y-axis show longitude and latitude, respectively. Abbreviations: GAM, generalized additive model.



Supplementary Table 1. Mean (standard deviation)<sup>1</sup> values of weather information per 12 hours in 16 Japanese cities between June and September from 2015 to 2018

|             | 2015-2017 in the training dataset |                      |              | 2018 in the testing dataset |                      |              |
|-------------|-----------------------------------|----------------------|--------------|-----------------------------|----------------------|--------------|
|             | Temperature, °C                   | Relative humidity, % | WBGT, °C     | Temperature, °C             | Relative humidity, % | WBGT, °C     |
| Kobe        | 24.93 (3.16)                      | 75.7 (11.28)         | 23.47 (3.44) | 25.36 (3.48)                | 75.3 (11.11)         | 23.76 (3.48) |
| Ashiya      | 25.12 (3.24)                      | 73.53 (11.53)        | 23.38 (3.43) | 25.74 (3.62)                | 72.34 (11.54)        | 23.78 (3.48) |
| Nishinomiya | 25.32 (3.24)                      | 72.21 (11.77)        | 23.43 (3.42) | 25.94 (3.72)                | 71.13 (11.87)        | 23.82 (3.51) |
| Amagasaki   | 25.93 (3.3)                       | 69.87 (12.02)        | 23.74 (3.4)  | 26.71 (3.78)                | 68.84 (12.02)        | 24.3 (3.49)  |
| Akashi      | 25.23 (3.29)                      | 75.33 (10.98)        | 23.7 (3.49)  | 25.82 (3.46)                | 75.74 (10.58)        | 24.23 (3.48) |
| Himeji      | 24.5 (3.47)                       | 78.24 (11.1)         | 23.31 (3.62) | 25.13 (3.82)                | 78.5 (11.71)         | 23.89 (3.72) |
| Kyoto       | 24.44 (3.63)                      | 74.32 (12.55)        | 22.75 (3.6)  | 25.45 (4.24)                | 70.58 (13.31)        | 23.24 (3.74) |
| Uji         | 25.09 (3.71)                      | 72.27 (12.76)        | 23.16 (3.6)  | 26.47 (4.31)                | 68.56 (13.19)        | 23.99 (3.73) |
| Muko        | 25.32 (3.66)                      | 71.3 (12.68)         | 23.3 (3.57)  | 26.64 (4.33)                | 67.99 (13.23)        | 24.1 (3.78)  |
| Nagaokakyo  | 25.18 (3.64)                      | 72.09 (12.67)        | 23.25 (3.57) | 26.4 (4.29)                 | 68.64 (13.21)        | 23.95 (3.75) |
| Osaka       | 25.88 (3.4)                       | 70.05 (11.91)        | 23.74 (3.44) | 26.78 (3.89)                | 69.53 (12.02)        | 24.46 (3.55) |
| Toyonaka    | 25.78 (3.35)                      | 69.59 (12.51)        | 23.56 (3.39) | 26.56 (3.93)                | 67.86 (12.74)        | 24.03 (3.53) |
| Mino        | 24.9 (3.36)                       | 72.67 (12.64)        | 23.07 (3.45) | 25.51 (4.01)                | 70.26 (13.12)        | 23.31 (3.6)  |
| Ikeda       | 24.91 (3.28)                      | 70.73 (12.55)        | 22.88 (3.38) | 25.47 (3.99)                | 69.28 (12.95)        | 23.17 (3.61) |
| Suita       | 25.74 (3.38)                      | 70.13 (12.33)        | 23.59 (3.42) | 26.67 (4)                   | 68.11 (12.74)        | 24.16 (3.58) |
| Sakai       | 25.67 (3.4)                       | 71.48 (11.91)        | 23.71 (3.48) | 26.61 (3.87)                | 70.74 (11.8)         | 24.43 (3.55) |

Abbreviations: WBGT, wet bulb globe temperature

<sup>1</sup> Mean (standard deviation) values were based on mean values per city per 12 hours (6:00 am to 5:59 pm, and 6:00 pm to 5:59 am).

Supplementary Table 2. City-specific RMSEs of prediction models for the number of all heatstrokes

|             | Training dataset                 |                                  |                                                                                                  | Testing dataset                  |                                  |                                                                                                  |
|-------------|----------------------------------|----------------------------------|--------------------------------------------------------------------------------------------------|----------------------------------|----------------------------------|--------------------------------------------------------------------------------------------------|
|             | GAM<br>(common to<br>all cities) | GAMs<br>specific to<br>each city | Hybrid model consisting<br>of GAM and under-<br>sampling XGBoost model<br>(common to all cities) | GAM<br>(common to<br>all cities) | GAMs<br>specific to<br>each city | Hybrid model consisting<br>of GAM and under-<br>sampling XGBoost model<br>(common to all cities) |
| Kobe        | 2.00                             | 1.79                             | 1.79                                                                                             | 4.16                             | 16.68                            | 4.38                                                                                             |
| Ashiya      | 0.45                             | 0.45                             | 0.58                                                                                             | 0.6                              | 0.62                             | 0.97                                                                                             |
| Nishinomiya | 0.96                             | 0.93                             | 0.97                                                                                             | 1.4                              | 1.5                              | 1.57                                                                                             |
| Amagasaki   | 1.28                             | 1.2                              | 1.24                                                                                             | 2.28                             | 1.76                             | 2.15                                                                                             |
| Akashi      | 0.82                             | 0.77                             | 0.84                                                                                             | 1.25                             | 1.16                             | 1.18                                                                                             |
| Himeji      | 0.84                             | 0.8                              | 0.8                                                                                              | 1.59                             | 1.54                             | 1.57                                                                                             |
| Kyoto       | 2.58                             | 2.44                             | 2.27                                                                                             | 3.79                             | 4.26                             | 4.83                                                                                             |
| Uji         | 0.71                             | 0.7                              | 0.68                                                                                             | 1.11                             | 0.98                             | 1.83                                                                                             |
| Muko        | 0.52                             | 0.46                             | 0.76                                                                                             | 0.98                             | 0.64                             | 2.08                                                                                             |
| Nagaokakyo  | 0.67                             | 0.65                             | 0.77                                                                                             | 0.88                             | 0.71                             | 2.01                                                                                             |
| Osaka       | 3.18                             | 2.91                             | 2.88                                                                                             | 6.44                             | 5.97                             | 7.87                                                                                             |
| Toyonaka    | 0.89                             | 0.85                             | 0.86                                                                                             | 1.29                             | 1.19                             | 1.19                                                                                             |
| Mino        | 0.39                             | 0.38                             | 0.58                                                                                             | 0.57                             | 0.51                             | 0.99                                                                                             |
| Ikeda       | 0.35                             | 0.35                             | 0.64                                                                                             | 0.34                             | 0.43                             | 1.25                                                                                             |
| Suita       | 0.77                             | 0.71                             | 0.81                                                                                             | 1.22                             | 1.23                             | 1.57                                                                                             |
| Sakai       | 1.43                             | 1.35                             | 1.35                                                                                             | 2.52                             | 9.75                             | 2.52                                                                                             |

Abbreviations: RMSE, root-mean-square error; GAM, generalized additive model.

Supplementary Table 3. City-specific RMSEs of prediction models for the number of heatstrokes of hospital admission and death cases

|             | Training dataset              |                            | Testing dataset               |                            |
|-------------|-------------------------------|----------------------------|-------------------------------|----------------------------|
|             | GAM<br>(common to all cities) | GAMs specific to each city | GAM<br>(common to all cities) | GAMs specific to each city |
| Kobe        | 0.93                          | 0.89                       | 1.14                          | 1.18                       |
| Ashiya      | 0.31                          | 0.29                       | 0.35                          | 0.39                       |
| Nishinomiya | 0.43                          | 0.42                       | 0.58                          | 0.61                       |
| Amagasaki   | 0.72                          | 0.67                       | 0.89                          | 0.95                       |
| Akashi      | 0.45                          | 0.45                       | 0.65                          | 0.62                       |
| Himeji      | 0.44                          | 0.41                       | 0.76                          | 0.79                       |
| Kyoto       | 0.93                          | 0.97                       | 1.16                          | 1.23                       |
| Uji         | 0.33                          | 0.33                       | 0.61                          | 0.62                       |
| Muko        | 0.32                          | 0.30                       | 0.47                          | 0.47                       |
| Nagaokakyo  | 0.37                          | 0.35                       | 0.51                          | 0.48                       |
| Osaka       | 1.52                          | 1.47                       | 1.97                          | 2.36                       |
| Toyonaka    | 0.41                          | 0.41                       | 0.46                          | 0.54                       |
| Mino        | 0.14                          | 0.13                       | 0.21                          | 0.23                       |
| Ikeda       | 0.13                          | 0.12                       | 0.18                          | 0.18                       |
| Suita       | 0.26                          | 0.24                       | 0.40                          | 0.42                       |
| Sakai       | 0.59                          | 0.58                       | 0.96                          | 4.46                       |

Abbreviations: RMSE, root-mean-square error; GAM, generalized additive model.

Supplementary Table 4. Space of hyperparameters of GAM, random forest, XGBoost, and under-sampling XGBoost<sup>1</sup>

| Tables  | Models                                                                            | Hyperparameters                          | Range                                                                   | Selected values |
|---------|-----------------------------------------------------------------------------------|------------------------------------------|-------------------------------------------------------------------------|-----------------|
| Table 2 | GAM                                                                               | Degree of freedom                        | 1 to 3 (by increments of tenths)                                        | 3               |
| Table 2 | Random forest                                                                     | mtry                                     | 2, and 3 to 19 (by increments of 2)                                     | 2               |
| Table 2 | XGBoost                                                                           |                                          |                                                                         |                 |
|         | <i>Before selecting features by RFE</i>                                           | 1 <sup>st</sup> step: nrounds            | 10 to 90 (by increments of 10) and<br>100 to 1000 (by increments of 10) | 300             |
|         |                                                                                   | 1 <sup>st</sup> step: max tree depth     | 3, 5, 7, 9                                                              | 3               |
|         |                                                                                   | 1 <sup>st</sup> step: min child weight   | 1, 2, 3, 4, 5                                                           | 1               |
|         |                                                                                   | 2 <sup>nd</sup> step: gamma              | 0 to 0.4 (by increments of 0.01)                                        | 0.28            |
|         |                                                                                   | 3 <sup>rd</sup> step: col sample by tree | 0.6 to 1.0 (by increments of 0.1)                                       | 0.8             |
|         |                                                                                   | 3 <sup>rd</sup> step: subsample          | 0.6 to 1.0 (by increments of 0.1)                                       | 0.9             |
|         |                                                                                   | 4 <sup>th</sup> step: eta                | 0.01 to 0.1 (by increments of 0.01)                                     | 0.06            |
|         | <i>After selecting features by RFE</i>                                            | 1 <sup>st</sup> step: nrounds            | 10 to 90 (by increments of 10) and<br>100 to 1000 (by increments of 10) | 300             |
|         |                                                                                   | 1 <sup>st</sup> step: max tree depth     | 3, 5, 7, 9                                                              | 3               |
|         |                                                                                   | 1 <sup>st</sup> step: min child weight   | 1, 2, 3, 4, 5                                                           | 5               |
|         |                                                                                   | 2 <sup>nd</sup> step: gamma              | 0 to 0.4 (by increments of 0.01)                                        | 0.02            |
|         |                                                                                   | 3 <sup>rd</sup> step: col sample by tree | 0.6 to 1.0 (by increments of 0.1)                                       | 0.6             |
|         |                                                                                   | 3 <sup>rd</sup> step: subsample          | 0.6 to 1.0 (by increments of 0.1)                                       | 1               |
|         |                                                                                   | 4 <sup>th</sup> step: eta                | 0.01 to 0.1 (by increments of 0.01)                                     | 0.1             |
| Table 2 | GAM specific to each city                                                         |                                          |                                                                         |                 |
|         | <i>Model development when selecting feature variables by RFE in all 16 cities</i> | Degree of freedom                        | 1 to 3 (by increments of tenths)                                        | 3               |

*Model specific to each city using the selected features by RFE*

|                    |                   |                                  |       |
|--------------------|-------------------|----------------------------------|-------|
| <i>Akashi</i>      | Degree of freedom | 1 to 3 (by increments of tenths) | 3     |
| <i>Amagasaki</i>   | Degree of freedom | 1 to 3 (by increments of tenths) | 1.444 |
| <i>Ashiya</i>      | Degree of freedom | 1 to 3 (by increments of tenths) | 1.444 |
| <i>Himeji</i>      | Degree of freedom | 1 to 3 (by increments of tenths) | 2.111 |
| <i>Ikeda</i>       | Degree of freedom | 1 to 3 (by increments of tenths) | 1     |
| <i>Kobe</i>        | Degree of freedom | 1 to 3 (by increments of tenths) | 3     |
| <i>Kyoto</i>       | Degree of freedom | 1 to 3 (by increments of tenths) | 3     |
| <i>Mino</i>        | Degree of freedom | 1 to 3 (by increments of tenths) | 1.222 |
| <i>Muko</i>        | Degree of freedom | 1 to 3 (by increments of tenths) | 2.111 |
| <i>Nagaokakyo</i>  | Degree of freedom | 1 to 3 (by increments of tenths) | 2.111 |
| <i>Nishinomiya</i> | Degree of freedom | 1 to 3 (by increments of tenths) | 1.666 |
| <i>Osaka</i>       | Degree of freedom | 1 to 3 (by increments of tenths) | 3     |
| <i>Sakai</i>       | Degree of freedom | 1 to 3 (by increments of tenths) | 1.444 |
| <i>Suita</i>       | Degree of freedom | 1 to 3 (by increments of tenths) | 1     |
| <i>Toyonaka</i>    | Degree of freedom | 1 to 3 (by increments of tenths) | 1.444 |
| <i>Uji</i>         | Degree of freedom | 1 to 3 (by increments of tenths) | 1.666 |

Table 3 Under-sampling XGBoost

|                                                                                                                      |                                                                                              |                                    |    |
|----------------------------------------------------------------------------------------------------------------------|----------------------------------------------------------------------------------------------|------------------------------------|----|
| <i>Definition of spike cluster</i>                                                                                   | Percentiles of the number of all heatstroke cases in 5 cities with population size > 500,000 | 90 to 98 (1 percentile increments) | 93 |
| <i>XGBoost, a classifier to classify the training dataset of the 5 cities into spike cluster or no-spike cluster</i> | nrounds                                                                                      | 50, 100, 150                       | 50 |
|                                                                                                                      | max tree depth                                                                               | 1, 2, 3                            | 2  |

|         |                                                |                                              |                                                                      |      |
|---------|------------------------------------------------|----------------------------------------------|----------------------------------------------------------------------|------|
|         |                                                | min child weight                             | 1                                                                    | 1    |
|         |                                                | gamma                                        | 0                                                                    | 0    |
|         |                                                | col sample by tree                           | 0.6, 0.8                                                             | 0.8  |
|         |                                                | subsample                                    | 0.50, 0.75, 1.00                                                     | 0.5  |
|         |                                                | eta                                          | 0.3, 0.4                                                             | 0.3  |
|         | <i>Under-sampling</i>                          | Sample size of a resample for under-sampling | 100 or 200                                                           | 200  |
|         | <i>XGBoost with under-sampling<sup>2</sup></i> | nrounds                                      | 50, 100, 150                                                         | 50   |
|         |                                                | max tree depth                               | 1, 2, 3                                                              | 3    |
|         |                                                | min child weight                             | 1                                                                    | 1    |
|         |                                                | gamma                                        | 0                                                                    | 0    |
|         |                                                | col sample by tree                           | 0.6, 0.8                                                             | 0.8  |
|         |                                                | subsample                                    | 0.50, 0.75, 1.00                                                     | 1    |
|         |                                                | eta                                          | 0.3, 0.4                                                             | 0.3  |
| Table 4 | GAM                                            | Degree of freedom                            | 1 to 3 (by increments of tenths)                                     | 3    |
| Table 4 | Random forest                                  | mtry                                         | 2, and 3 to 19 (by increments of 2)                                  | 3    |
| Table 4 | XGBoost                                        |                                              |                                                                      |      |
|         | <i>Before selecting features by RFE</i>        | 1 <sup>st</sup> step: nrounds                | 10 to 90 (by increments of 10) and 100 to 1000 (by increments of 10) | 90   |
|         |                                                | 1 <sup>st</sup> step: max tree depth         | 3, 5, 7, 9                                                           | 5    |
|         |                                                | 1 <sup>st</sup> step: min child weight       | 1, 2, 3, 4, 5                                                        | 4    |
|         |                                                | 2 <sup>nd</sup> step: gamma                  | 0 to 0.4 (by increments of 0.01)                                     | 0.32 |
|         |                                                | 3 <sup>rd</sup> step: col sample by tree     | 0.6 to 1.0 (by increments of 0.1)                                    | 1    |
|         |                                                | 3 <sup>rd</sup> step: subsample              | 0.6 to 1.0 (by increments of 0.1)                                    | 0.6  |
|         |                                                | 4 <sup>th</sup> step: eta                    | 0.01 to 0.1 (by increments of 0.01)                                  | 0.08 |
|         | <i>After selecting features by RFE</i>         | 1 <sup>st</sup> step: nrounds                | 10 to 90 (by increments of 10) and 100 to 1000 (by increments of 10) | 80   |

|                                          |                                     |      |
|------------------------------------------|-------------------------------------|------|
| 1 <sup>st</sup> step: max tree depth     | 3, 5, 7, 9                          | 5    |
| 1 <sup>st</sup> step: min child weight   | 1, 2, 3, 4, 5                       | 2    |
| 2 <sup>nd</sup> step: gamma              | 0 to 0.4 (by increments of 0.01)    | 0.11 |
| 3 <sup>rd</sup> step: col sample by tree | 0.6 to 1.0 (by increments of 0.1)   | 0.9  |
| 3 <sup>rd</sup> step: subsample          | 0.6 to 1.0 (by increments of 0.1)   | 0.8  |
| 4 <sup>th</sup> step: eta                | 0.01 to 0.1 (by increments of 0.01) | 0.1  |

Table 4 GAM specific to each city

*Model development when selecting feature variables by RFE in all 16 cities*

*Model specific to each city using the selected features by RFE*

|                    |                   |                                  |       |
|--------------------|-------------------|----------------------------------|-------|
| <i>Akashi</i>      | Degree of freedom | 1 to 3 (by increments of tenths) | 3     |
| <i>Amagasaki</i>   | Degree of freedom | 1 to 3 (by increments of tenths) | 2.111 |
| <i>Ashiya</i>      | Degree of freedom | 1 to 3 (by increments of tenths) | 1.888 |
| <i>Himeji</i>      | Degree of freedom | 1 to 3 (by increments of tenths) | 1     |
| <i>Ikeda</i>       | Degree of freedom | 1 to 3 (by increments of tenths) | 1     |
| <i>Kobe</i>        | Degree of freedom | 1 to 3 (by increments of tenths) | 3     |
| <i>Kyoto</i>       | Degree of freedom | 1 to 3 (by increments of tenths) | 1     |
| <i>Mino</i>        | Degree of freedom | 1 to 3 (by increments of tenths) | 1.444 |
| <i>Muko</i>        | Degree of freedom | 1 to 3 (by increments of tenths) | 1     |
| <i>Nagaokakyo</i>  | Degree of freedom | 1 to 3 (by increments of tenths) | 3     |
| <i>Nishinomiya</i> | Degree of freedom | 1 to 3 (by increments of tenths) | 1.444 |
| <i>Osaka</i>       | Degree of freedom | 1 to 3 (by increments of tenths) | 3     |
| <i>Sakai</i>       | Degree of freedom | 1 to 3 (by increments of tenths) | 1     |
| <i>Suita</i>       | Degree of freedom | 1 to 3 (by increments of tenths) | 1.888 |
| <i>Toyonaka</i>    | Degree of freedom | 1 to 3 (by increments of tenths) | 1     |

*Uji* Degree of freedom 1 to 3 (by increments of tenths) 2.111

---

Abbreviations: GAM, generalized additive model; XGBoost, extreme gradient boosting decision tree; RFE, recursive feature elimination.

<sup>1</sup> We used the following functions in the “caret” R package: “gamSpline” for GAM, “rf” for random forest, and “xgbTree” for XGBoost.

We used default values of hyperparameters for the functions, not shown in this table.

<sup>2</sup> We used a bagging technique with 10 resampling to develop under-sampling XGBoost. Thus, we showed selected hyperparameters of one of these 10 under-sampling XGBoost models.
